# Supplementary material for: Rho-associated kinase and zipper-interacting protein kinase, but not myosin light chain kinase, are involved in the regulation of myosin phosphorylation in serum-stimulated human arterial smooth muscle cells
Source: PubMed Central journal article supplement (PMC6910671; doi:10.1371/journal.pone.0226406), 2019-12-13

**A**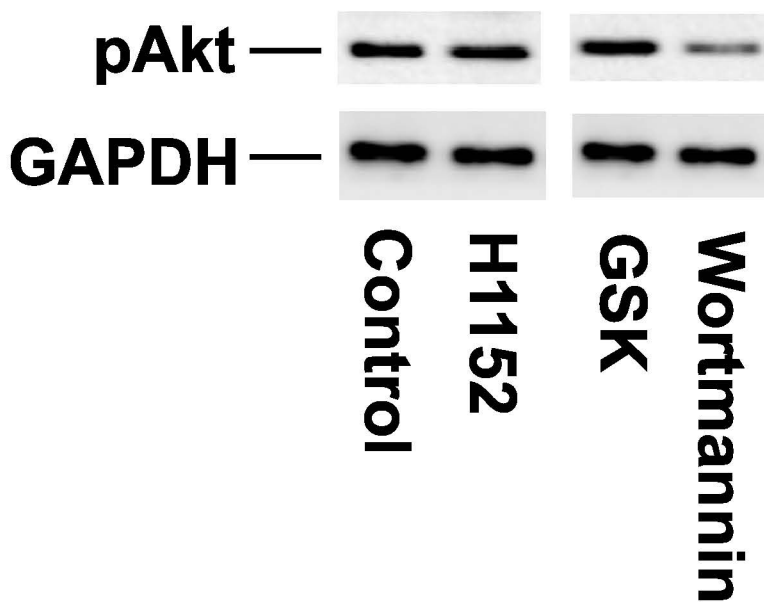**B**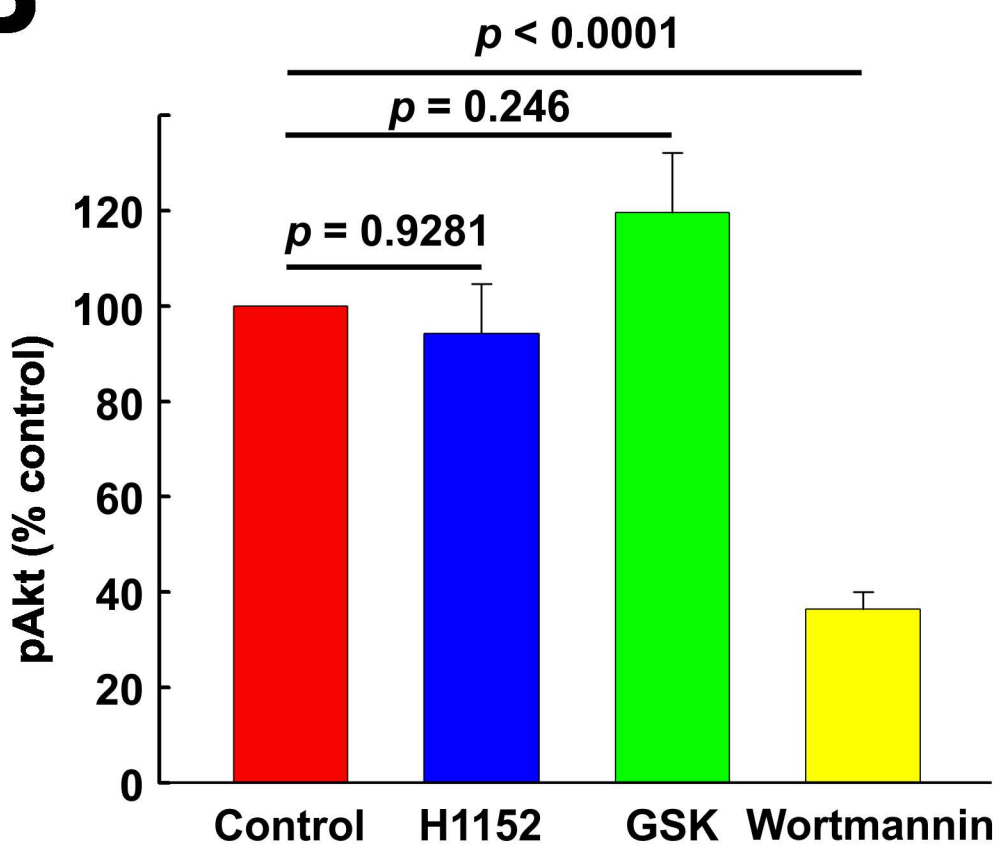

Supplement: pone.0226406.s005.pdf [file pone.0226406.s005.pdf]
